# Supplementary material for: Diallyl disulphide suppresses the cannonical Wnt signaling pathway and reverses the fibronectin-induced epithelial mesenchymal transition of A549 lung cancer cells
Source: Royal Society of Chemistry journal article supplement (doi:10.1039/c8fo00246k), 2018-11-13
Supplement: c8fo00246k1.pdf [file c8fo00246k1.pdf]

### Effect of DADS on BEAS-2B cells

Different concentrations of DADS ranging from 0-10.0  $\mu\text{M}$  were administered on BEAS-2B cells and it was observed that 7.5  $\mu\text{M}$  did not induce any significant cytotoxicity on the cells (Supplementary Fig. 1a).

In cell adhesion assay FN enhanced the number of adherent cells in a dose dependent manner. However, when selected dose of DADS (7.5  $\mu\text{M}$ ) was administered there was no significant difference in number of adherent cells between control and DADS treated cells. Even when no. of adherent cells was compared between FN treated cells and FN+DADS treated cells no significant difference was observed (Fig.1b).

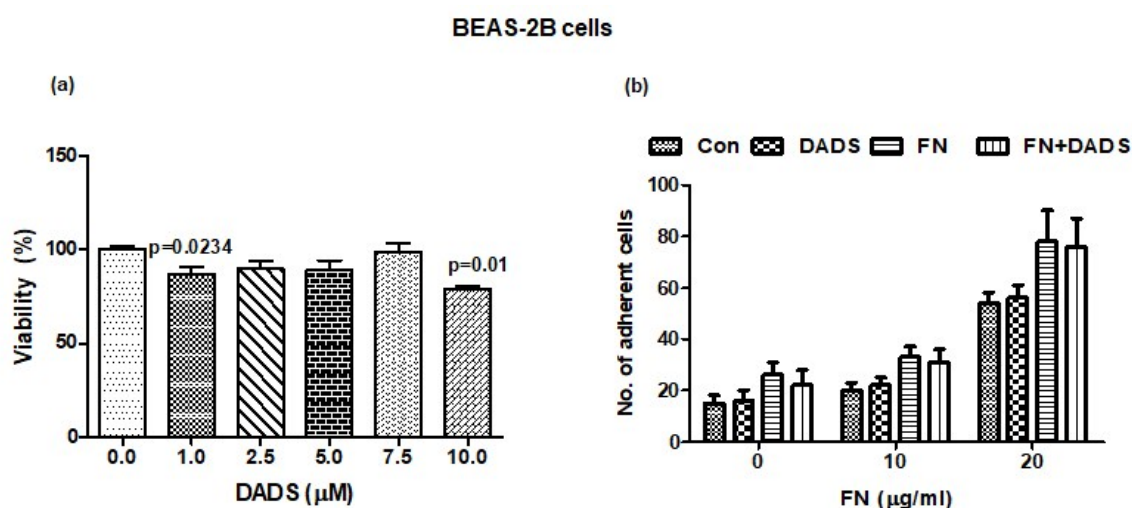

Supplementary Fig.1

**Supplementary Fig.1: Effect of DADS on viability (a) and adhesion (b) of BEAS-2B cells**
